## **COVID-19 and Vitamin D (Co-VIVID Study): a systematic review and meta-analysis of randomized controlled trials**

**Running title:** COVID-19 and Vitamin D (Co-VIVID Study)

Seshadri Reddy Varikasuvu <sup>a\*</sup>, Balachandar Thangappazham <sup>b</sup>, Hemanth Raj <sup>c</sup>

<sup>a</sup> Department of Biochemistry, All India Institute of Medical Sciences (AIIMS), Deoghar, Jharkhand, India

<sup>b</sup> StepOne NGO, Pegasus Block, Malleswaram West, Bengaluru, Karnataka, India

<sup>c</sup> Department of Medicine, Mount Medical Centre, Tamil Nadu, India

**\*Corresponding author:**

Dr. Seshadri Reddy Varikasuvu  
Assistant Professor, Department of Biochemistry  
All India Institute of Medical Sciences  
AIIMS, Deoghar, Jharkhand-814142, India  
Phone: +91 81 0 61 45 001  
E-mail: [lifescchemistry@live.com](mailto:lifescchemistry@live.com)  
<https://orcid.org/0000-0002-2230-4676>

## Abstract

**Background:** Vitamin D levels have been reported to be associated with COVID-19 susceptibility, severity and mortality events.. We performed a meta-analysis of randomized controlled trials (RCTs) to evaluate the use of vitamin D intervention on COVID-19 outcomes.

**Methods:** Literature search was conducted using PubMed, Cochrane library, and ClinicalTrials.gov databases (latest search on August 5, 2021). We included RCTs reporting the use of vitamin D intervention to control/placebo group in COVID-19. Two independent researchers did literature search, abstracted data, and the risk of bias assessment. **Results:** A total of 6 RCTs with 551 COVID-19 patients were included. The overall collective evidence pooling all the outcomes across all RCTs indicated the beneficial use of vitamin D intervention in COVID-19 (relative risk, RR = 0.60, 95% CI 0.40 to 0.92, Z=2.33, p=0.02, I<sup>2</sup> = 48%). However, no statistical significance was observed for individual outcomes of ICU care (RR = 0.11, 95% CI 0.15 to 1.30, Z=1.48, p=0.14, I<sup>2</sup> = 66%) and mortality (RR = 0.78, 95% CI 0.25 to 2.40, Z=0.66, p=0.02, I<sup>2</sup> = 33%), though decreased rates were noted. The rates of RT-CR positivity was significantly decreased in the intervention group as compared to the non-vitamin D groups (RR = 0.46, 95% CI 0.24 to 0.89, Z=2.31, p=0.02, I<sup>2</sup> = 0%). **Conclusion:** COVID-19 patients supplemented with vitamin D are more likely to demonstrate fewer rates of ICU admission, mortality events and RT-PCR positivity. However, no statistical significance has been achieved for individual outcomes of ICU and deaths. More RCTs and completion of ongoing trials largely needed to precisely establish the association between vitamin D use and COVID-19.

**Keywords:** Cholecalciferol; COVID-19; Randomized controlled trial; SARS-Cov-2; Vitamin D

## Introduction

Since December 2019, millions have infected with severe acute respiratory syndrome associated with coronavirus-2 (SARS-CoV-2) causing Coronavirus disease 2019 (COVID-19), a global pandemic the World Health Organisation (WHO). The COVID-19 symptoms range from mildly symptomatic to moderate, severe to critical with patients needing hospitalization and intensive care unit (ICU) admissions. As of 5<sup>th</sup> August 2021 and WHO, there have been 200,174,883 confirmed COVID-19 cases, including 4,255,892 deaths [1]. Multiple risk factors in the form of age, comorbidities, exaggerated immune response in the form of cytokine storm, oxidative stress, activation of pro-coagulation factors and severe inflammation contribute to the disease progression [2].

It has been documented that vitamin D deficiency is associated with severity of viral infections such as influenza [3]. Recent evidence shows the potential of vitamin D to affect SARS-CoV-2 gene expression and alleviate infection upon binding to the vitamin D response element [4,5]. Vitamin D regulates the rennin-angiotensin system and expression of angiotensin converting enzyme 2 (ACE2), and its receptor that mediates SARS-CoV-2 infection. Further, vitamin D is known to exert immuno-modulatory effects in innate and adaptive immune responses, induces the production of antimicrobial proteins and could act as anti-inflammatory agent [4,6,7].

Despite vaccination rollouts, much focus has been documented on additional preventive measures such as using vitamin D supplementation to be promising in COVID-19 [7,8]. While strong observational evidence [9–11] indicate the association of low vitamin D levels to the COVID-19 susceptibility, severity and mortality outcomes, the beneficial use of vitamin D supplements in COVID-19 has been reported in some non-randomized observational cohorts

[12,13]. However, there is still a scarcity of information through randomized controlled trials (RCTs) on the use of vitamin D supplementation in COVID-19 patients. With many of the trials in the ongoing stage, there is a greater need for supportive evidence through meta-analysis of available RCTs [14–19]. Therefore, our objective of this study was to evaluate the effect of vitamin D intervention in relationship to several COVID-19 outcomes reported in all available RCTs.

## **Material and Methods**

This meta-analysis was conducted and reported according to the Preferred Reporting Items for Systematic Reviews and Meta-Analysis (PRISMA) [20]. The protocol was registered at PROSPERO: CRD42021271461.

### ***Literature search and study selection***

The literature search was conducted with no language restrictions using PubMed/MEDLINE, Cochrane library, EMBASE, SCOPUS, Science Direct, and ClinicalTrials.gov from inception to August 5, 2021. The search strategy included both the MeSH and broad text-word search terms: ("vitamin D" (MeSH Terms) OR "vitamin D" (All Fields) OR "ergocalciferols" (MeSH Terms) OR "ergocalciferols" (All Fields)) AND ("SARS-CoV-2 OR COVID-19" (MeSH Terms) OR "SARS-CoV-2 OR COVID-19" (All Fields)). The other terms used for vitamin D were 25-Hydroxyvitamin D, 25-Hydroxycholecalciferol, calcidiol, 1,25-dihydroxyvitamin D<sub>3</sub>, Calcifediol, and Calcitriol. The other terms used for SARS-CoV-2/COVID-19 are Coronavirus and 2019-nCoV Disease. The bibliographies of published articles were manually hand-searched for additional studies.

The inclusion criteria were: (1) RCTs comparing supplementation of vitamin D to placebo/control; (2) RCTs reporting the use of vitamin D supplementation on one or more of the following; COVID-19 severity, ICU care, mortality events, seropositivity and RT-PCR positivity or any other adverse events. No prespecified limitations applied for dose or type of vitamin D and follow-up durations. The exclusion criteria were: (1) studies with no control/comparator group; (2) study types other than RCTs such as observational studies and trial-protocols. In case of duplicate articles, only a recent report with all relevant information was included. All the relevant RCTs were screened at the title, abstract and full-text levels for their suitability in this systematic review and meta-analysis.

### ***Data extraction and risk of bias assessment***

The information extracted from eligible RCTs include: first author names, study country and setting, sample sizes, randomization, blinding, vitamin D form and dose, follow-up details, number of events for study outcomes (severity, ICU care, mortality, seropositivity and RT-PCR positivity) in treatment and comparator groups, and other study characteristics. Two investigators (S.R.V. and B.T.) independently assessed the potential risks of bias of the RCTs using the Cochrane Risk of Bias Tool [21]. Two authors (S.R.V. and B.T.) have independently performed the literature search, study selection and assessment. Any discrepancies were resolved upon discussion with a third investigator (H.R.). When required, the corresponding authors of respective articles were contacted through e-mail to obtain data/clarification.

### ***Data analysis***

For this meta-analysis of RCTs, we reported the effect sizes as risk ratio (RR) for the number of events on the outcomes such as severity, ICU admissions, mortality, seropositivity and RT-PCR

positivity in treated and control groups. We reported RR values with their 95% confidence intervals (CI) using Mantel-Haenszel analysis method and random-effects model. The overall effect size for RR was presented Z-score. A Z-score with a  $p$  value of  $<0.05$  was considered statistically significant. The between-study heterogeneity was examined by the  $I^2$  statistics and the values  $>50\%$  were considered to indicate a high degree of heterogeneity [22]. We examined the funnel plot asymmetry for publication bias followed by Begg and Egger's tests.

### ***Sub-group and sensitivity analysis***

We conducted sub-group analysis based on vitamin D form, vitamin D deficient studies, single or multi-centric trials, and double-blinded status. We also performed a one-study leave-out sensitivity analysis for individual outcomes by excluding one trial at a time and by repeating the analysis. The meta-regression analysis was not possible due to the small number of available trials.

## **Results**

We reviewed 755 articles for eligibility, 6 RCTs [14–19] comprising 551 COVID-19 patients were selected for final analysis (Fig. 1).

While all the studies enrolled participants aged  $>18$  years with mean age in individual studies range from 36 to 56 years, the proportion of men varied from 44 to 59%. The symptoms of COVID-19 patients diagnosed by RT-PCR (viral RNA) or ELISA and/or radiographic testing varied across the individual studies (mild-moderate-severe). The criteria for inclusion and exclusion, varied study settings, participant characteristics, number of participants with preexisting comorbidities and treatment strategies, vitamin D form, dosage, reported outcomes and other study characteristics are presented in Table 1.

There were two multi-center [16,18] and four single center RCTs [14,15,17,19], one double-blinded [16] and four registered clinical trials [14–16,18]. Vitamin D treatment was compared to placebo in two studies [16,17], non-vitamin control in three studies [14,15,19], and standard treatment comparator group in one study [18]. While Castillo et al. [14] used calcifediol with an allocation ratio of 2:1; all other studies used cholecalciferol with an allocation ratio of 1:1. The baseline vitamin D statuses in three studies [15,17,18] were reported to be sub-optimal and one study reported a separate outcome analysis in vitamin D deficient participants [16]. The vitamin D sufficiency status, treatment doses, follow-up durations, adverse events and study limitations are detailed in Table 1. The risk of bias assessment based on five domains and the overall bias of included RCTs is presented the supplementary appendix.

The collective evidence in Fig.2 shows that vitamin D treatment was significantly associated with reduced risk of COVID-19 severity when six observations on the number events for symptom severity, ICU care and mechanical ventilation were pooled (RR = 0.46, 95% CI 0.23 to 0.93,  $Z=2.16$ ,  $p=0.03$ ,  $I^2 = 52\%$ ). But the pooled estimate from four studies showed that the use of vitamin D was not significantly associated with ICU outcome alone (RR = 0.11, 95% CI 0.15 to 1.30,  $Z=1.48$ ,  $p=0.14$ ,  $I^2 = 66\%$ ).

The pooled estimate from two studies showed a statistically significant RR for COVID-19 RT-PCR positivity (RR = 0.46, 95% CI 0.24 to 0.89,  $Z=2.31$ ,  $p=0.02$ ,  $I^2 = 0\%$ ). Whereas the pooled evidence from four studies showed that the association of vitamin D with mortality outcome was not statistically significant (RR = 0.78, 95% CI 0.25 to 2.40,  $Z=0.66$ ,  $p=0.02$ ,  $I^2 = 33\%$ ). However, when all the observations on all reported outcomes were pooled, there was statistically significant evidence on the use of vitamin D treatment in reducing overall COVID-19 related

outcomes (RR = 0.60, 95% CI 0.40 to 0.92, Z=2.33, p=0.02,  $I^2 = 48\%$ ). The test for subgroup differences was not statistically significant ( $I^2 = 49\%$ , p = 0.12).

The results of sub-group analysis were presented in Table 2. None of the outcomes in different categories of subgroups showed statistically significant RR values. No statistically significant difference was observed for the pooled estimate of outcomes from studies with vitamin D suboptimal status. The sensitivity analysis performed leaving-out any one of the included trials at a time and repeating the analysis showed statistically non-significant RR values for individual outcomes. Whereas, for all studied outcomes together, the pooled RR remained statistically significant after leaving out any particular study/observation. The  $I^2$  value significantly changed from 48% to 5% after leaving-out a study by Castillo et al. (ICU and mortality observations) and repeating the analysis suggestive of major source of heterogeneity. The funnel plot analysis (Fig.3) with Begg's (p = 0.17) and Egger tests (p = 0.14) on all the outcomes across all the RCTs indicated no significant publication bias.

## **Discussion**

This meta-analysis of RCTs showed that COVID-19 patients supplemented with vitamin D had reduced overall risk for all outcomes. The collective overall evidence on severity, ICU care, mortality, sero and RT-PCR positivity events reported in all trials indicated that COVID-19 patients treated with vitamin D showed lower rates of these outcomes relative to patients receiving no-vitamin D/standard/placebo. Though there were no statistically significant differences in the individual outcomes of ICU admission and mortality, the respective RRs indicated a decrease in the rates of these outcomes in vitamin D treated groups. However, there



was a statistically significant decrease in the rates of RT-PCR positivity in COVID-19 patients supplemented with vitamin D.

The first multicenter double-blind RCT study by Murai et al. [16] enrolled 237 moderate-severe COVID-19 patients. It had 119 patients in the experimental group treated with a single high dose of vitamin D<sub>3</sub> (200000 IU orally) and 118 patients in the placebo group receiving peanut oil. The results do not support the use of a high dose of vitamin D as it did not significantly reduce the length of hospital stay, hospital discharge, ICU admission and rates of mechanical ventilation and mortality. Similar findings were reported in subgroups of patients (57 in intervention and 58 in placebo arms) with vitamin D deficiency at baseline (<20 ng/mL), despite of achieving sufficient status ( $\geq 30$  ng/mL) in 86.7% of the vitamin D<sub>3</sub> group post intervention. This study reports more mortality events in the intervention arm (9/119) than the placebo (6/118) group.

In another multicenter RCT [18] randomizing 73 mild-moderate COVID-19 patients with suboptimal vitamin D status into experimental (n=36) and standard-comparator (n=33) groups receiving 5000 IU and 1000 IU of oral cholecalciferol daily for two weeks. This study though reports a significantly shorter recovery time to symptoms (even after adjusting for age, sex, BMI and D-dimer) in the intervention arm, no significant differences in ICU, mortality events and days to discharge were reported between groups. This study differs from that of Murai et al. [16] as it excludes severe COVID-19 cases, vitamin D dosage and duration, using standard comparator group in place of placebo, and in defining the suboptimal vitamin D status (<50 nmol/L). Further, this study also differs from all other trials as 47% of randomized participants had also received vitamin C supplements. The significant increase in vitamin D levels reported in treatment arm (5000 IU) post intervention along with other study findings are to be interpreted

with caution to the baseline vitamin D levels in the comparator arm. The post-treatment vitamin D levels (62.5 nmol/L) of the intervention arm are similar to that of the pre-treatment levels (63 nmol/L) in comparator arm ( $p=0.67$ ).

In an RCT by Sánchez-Zuno et al. [19] 42 mild COVID-19 patients were randomized to intervention arm (22 cases receiving 10000 IU of vitamin D<sub>3</sub> orally for 14 days) and comparator arm that receives no vitamin D<sub>3</sub> ( $n=20$ ). A stratified analysis based on the sufficient ( $\geq 30$  ng/mL) and insufficient ( $< 30$  ng/mL) baseline vitamin status indicated a significantly increased number of COVID-19 symptoms in the later group ( $p=0.03$ ). It was found that the intervention arm had significantly increased vitamin D levels post-treatment and presented fewer symptom severities on the seventh and fourteenth day of follow-up. The intervention arm also had lesser rates of seropositivity and RT-PCR positivity on the seventh and fourteenth day, respectively. In a study by Rastogi et al. [17] a similar observation was reported with a significant decrease in the proportion of SARS-CoV-2 RNA negativity in the intervention arm before day-21 ( $p<0.01$ ). This study randomized 40 mildly symptomatic or symptomatic COVID-19 patients into intervention and placebo arms of 20 cases each. The intervention arm received 60000 IU of cholecalciferol daily for 7 days and continued for another 7 days in six cases (who did not achieve a therapeutic target of  $>50$  ng/mL on day 7) and distilled water was supplied to placebo group.

There were two open label RCTs [14,15]. Lakkireddy et al. [15] randomized 130 mild-moderate COVID-19 cases, of which 87 cases who completed the study were analyzed in the intervention ( $n=44$ ) and comparator ( $n=43$ ) groups. The intervention arm received 60000 IU of oral vitamin D<sub>3</sub> daily for 8-10 days and the outcomes were recorded till 21 days. Supplementation resulted in a significant increase in vitamin D levels with a lower rate of ICU and mortalities in the intervention arm as compared to the comparator group. In the only trial using calcifediol, Castillo

et al. [14] randomized 76 patients into intervention (n=50) and comparator (n=26) groups depending on whether or not supplemented with calcifediol. The oral calcifediol supplemented varied at admission (0.532 mg), on days 3 and 7 (0.266 mg) and weekly until ICU/discharge (0.266 mg). This study concludes that vitamin D treatment resulted in significantly less probability of ICU admission and the statistical significance retained even after adjusting for comorbidities like diabetes and hypertension. However, there is no information available on the baseline and post-treatment vitamin D levels.

In general, it has been demonstrated that vitamin D induce antimicrobial peptides and mediates antiviral, apoptotic and autophagic activities [12,23]. The protective immuno-modulatory effects of this fat-soluble steroid vitamin have been reported in respiratory diseases [24,25]. Studies have proposed vitamin D deficiency as leading candidate in association with COVID-19 susceptibility, severity and progression [26,27]. However, there is no strong evidence through RCTs on the therapeutic benefits of vitamin D supplementation in COVID-19 outcomes. Our study results based on the available RCTs are suggestive of the overall beneficial effect of vitamin D treatment when all the observations across all RCTs were pooled as an overall effect size. Though no statistically significant differences were observed for ICU care and mortality outcomes individually, the observed RR values are suggestive of decrease in the rate of these outcomes in vitamin D treated COVID-19 patients. This meta-analysis based on RCTs is first of its kind on the subject and the results are supportive of vitamin D use in COVID-19. Further, as there is compatible evidence in the form of a meta-analysis of observational studies on the use of vitamin D in COVID-19 [13], the results of this study strongly suggests the need for future/ongoing RCTs to consider better designs, large sample sizes adequate enough to assess the effect of vitamin D supplementation on the individual COVID-19 related outcomes.

However, this study has some limitations. First, the heterogeneity observed in the meta-analysis could be due to methodological, participant and treatment variations of the included trials. While the single center RCTs have mainly contributed to the heterogeneity, leaving-out a study by Castillo et al. [14] decreased the  $I^2$  values from 48 to 5%, 66 to 0%, and 33 to 13% for the overall outcome pooling the results of all RCTs, ICU and mortality outcomes, respectively. This open label trial differs from all other RCTs as it uses calcifediol in varied concentrations at different time periods of the study. Second, there are only two placebo-controlled trials, one double-blinded study that uses a single high dose of vitamin D. Third, although no significant loss to the follow-up were reported in the RCTs, the proportion of participants and the criteria for sufficient and deficient vitamin D status varied across the trials. Fourth, the variations in the COVID-19 severity, comorbidities proportions and standard care treatment strategies could have influenced the heterogeneity and the overall result. Finally, the difference in the study settings, timings, randomization, blinding, and data collection strategies could have influenced the outcomes. None of the trials reported any adverse events due to vitamin supplementation. As there are only two and three trials respectively in the years 2020 [14,17] and 2021 [15,16,18,19] including small sample sizes, this meta-analysis strongly recommends for more RCTs for better evaluating the role of vitamin D in COVID-19 patients. Therefore, the evidence obtained upon completion of several ongoing trials [28] (CORONAVIT, COVITD-19, COVIDIOL, VIVID and COVIT-TRIAL) will be crucial in better determination on vitamin D in association with COVID-19.

In conclusion, vitamin D use was associated with significant decrease in rates of COVID-19 related events when all the outcomes were pooled across all RCTs. However, there was no significant difference observed for the relative risk for ICU admission and mortality outcomes upon vitamin D supplementation. The overall pooled results in addition to a significant decrease

in the rates of RT-PCR positivity observed in this study are suggestive of the possible beneficial effects of vitamin D. These results would indicate the need for more RCTs in supportive of ongoing trials evaluating the effect of vitamin D in COVID-19.

### **Author Statement**

S.R.V: Conceptualization, literature search, data extraction, methodology, analysis, interpretation, writing, supervising, reviewing and editing. B.T: literature search, assistance in data extraction, analysis, review and writing. H.R: conduction and verification of literature search, data extraction results and analysis.

### **Funding**

The costs involved in the conduction of this systematic review and meta-analysis were borne by the authors themselves.

### **Declaration of Competing Interest**

The authors declare no conflict of interest.

### **Acknowledgements**

Dr. S.R. Varikasuvu specially acknowledge Bhairavi Sisters (Sahasra and Aagneya) for the time I could not give them during this work, as it was performed before 8 am and after 6 pm from its initiation to completion.

### **References**

- [1] WHO Coronavirus (COVID-19) Dashboard | WHO Coronavirus (COVID-19) Dashboard With Vaccination Data n.d. <https://covid19.who.int/> (accessed August 6, 2021).
- [2] M F, SK Z, M S, M D, MH A. Aging & COVID-19 susceptibility, disease severity, and

- clinical outcomes: The role of entangled risk factors. *Exp Gerontol* 2021;111507.  
<https://doi.org/10.1016/J.EXGER.2021.111507>.
- [3] RR W, TL L, RA S. An update on the association of vitamin D deficiency with common infectious diseases. *Can J Physiol Pharmacol* 2015;93:363–8.  
<https://doi.org/10.1139/CJPP-2014-0352>.
- [4] DTM B, LHC R, CHDC D, RB S. The possible benefits of vitamin D in COVID-19. *Nutrition* 2021;91–92:111356. <https://doi.org/10.1016/J.NUT.2021.111356>.
- [5] GV G. Tripartite Combination of Candidate Pandemic Mitigation Agents: Vitamin D, Quercetin, and Estradiol Manifest Properties of Medicinal Agents for Targeted Mitigation of the COVID-19 Pandemic Defined by Genomics-Guided Tracing of SARS-CoV-2 Targets in Human Cells. *Biomedicines* 2020;8.  
<https://doi.org/10.3390/BIOMEDICINES8050129>.
- [6] PHF G, D F, S O, AC S. Vitamin D and Infectious Diseases: Simple Bystander or Contributing Factor? *Nutrients* 2017;9. <https://doi.org/10.3390/NU9070651>.
- [7] Alsafar H, Grant WB, Hijazi R, Uddin M, Alkaabi N, Tay G, et al. COVID-19 disease severity and death in relation to vitamin D status among SARS-CoV-2-positive UAE residents. *Nutrients* 2021;13:1–14. <https://doi.org/10.3390/nu13051714>.
- [8] BS G. Rapid COVID-19 vaccine development. *Science* 2020;368:945–6.  
<https://doi.org/10.1126/SCIENCE.ABB8923>.
- [9] L O, M B, M N-M, C M, K S, MPW G, et al. Vitamin-D levels and intensive care unit outcomes of a cohort of critically ill COVID-19 patients. *Clin Chem Lab Med*

- 2021;59:1155–63. <https://doi.org/10.1515/CCLM-2020-1567>.
- [10] AM A, MJ B, MK L, D K, N C-P, J O, et al. Vitamin D Status Is Associated With In-Hospital Mortality and Mechanical Ventilation: A Cohort of COVID-19 Hospitalized Patients. *Mayo Clin Proc* 2021;96:875–86. <https://doi.org/10.1016/J.MAYOCP.2021.01.001>.
- [11] MV B, TV K, IA M, SA A, VP B, GM Y, et al. Low Circulating Vitamin D in Intensive Care Unit-Admitted COVID-19 Patients as a Predictor of Negative Outcomes. *J Nutr* 2021. <https://doi.org/10.1093/JN/NXAB107>.
- [12] J M, WB G, CL W. Evidence Regarding Vitamin D and Risk of COVID-19 and Its Severity. *Nutrients* 2020;12:1–24. <https://doi.org/10.3390/NU12113361>.
- [13] F P, A L, G P, G D, PL C, A G. Therapeutic and prognostic role of vitamin D for COVID-19 infection: A systematic review and meta-analysis of 43 observational studies. *J Steroid Biochem Mol Biol* 2021;211. <https://doi.org/10.1016/J.JSBMB.2021.105883>.
- [14] M EC, LM EC, JM VB, JF AD, J LM, R B, et al. “Effect of calcifediol treatment and best available therapy versus best available therapy on intensive care unit admission and mortality among patients hospitalized for COVID-19: A pilot randomized clinical study.” *J Steroid Biochem Mol Biol* 2020;203. <https://doi.org/10.1016/J.JSBMB.2020.105751>.
- [15] Lakkireddy M, Gadiga SG, Malathi RD, Karra ML, Raju ISSVPM, Ragini, et al. Impact of daily high dose oral vitamin D therapy on the inflammatory markers in patients with COVID 19 disease. *Sci Rep* 2021;11:1–8. <https://doi.org/10.1038/s41598-021-90189-4>.
- [16] Murai IH, Fernandes AL, Sales LP, Pinto AJ, Goessler KF, Duran CSC, et al. Effect of a

- Single High Dose of Vitamin D3 on Hospital Length of Stay in Patients with Moderate to Severe COVID-19: A Randomized Clinical Trial. *JAMA - J Am Med Assoc* 2021;325:1053–60. <https://doi.org/10.1001/jama.2020.26848>.
- [17] Rastogi A, Bhansali A, Khare N, Suri V, Yaddanapudi N, Sachdeva N, et al. Short term, high-dose vitamin D supplementation for COVID-19 disease: A randomised, placebo-controlled, study (SHADE study). *Postgrad Med J* 2020:1–4. <https://doi.org/10.1136/postgradmedj-2020-139065>.
- [18] Sabico S, Enani MA, Sheshah E, Aljohani NJ, Aldisi DA, Alotaibi NH, et al. Effects of a 2-week 5000 iu versus 1000 iu vitamin d3 supplementation on recovery of symptoms in patients with mild to moderate covid-19: A randomized clinical trial. *Nutrients* 2021;13. <https://doi.org/10.3390/nu13072170>.
- [19] Sánchez-Zuno GA, González-Estevez G, Matuz-Flores MG, Macedo-Ojeda G, Hernández-Bello J, Mora-Mora JC, et al. Vitamin D Levels in COVID-19 Outpatients from Western Mexico: Clinical Correlation and Effect of Its Supplementation. *J Clin Med* 2021;10:2378. <https://doi.org/10.3390/jcm10112378>.
- [20] Moher D, Liberati A, Tetzlaff J, Altman DG, Altman D, Antes G, et al. Preferred reporting items for systematic reviews and meta-analyses: The PRISMA statement. *PLoS Med* 2009;6. <https://doi.org/10.1371/journal.pmed.1000097>.
- [21] JAC S, J S, MJ P, RG E, NS B, I B, et al. RoB 2: a revised tool for assessing risk of bias in randomised trials. *BMJ* 2019;366. <https://doi.org/10.1136/BMJ.L4898>.
- [22] RM T, J D, MJ C, SG T, JP H. Predicting the extent of heterogeneity in meta-analysis,



- using empirical data from the Cochrane Database of Systematic Reviews. *Int J Epidemiol* 2012;41:818–27. <https://doi.org/10.1093/IJE/DYS041>.
- [23] M T-R, F S, V S, SM M. The interplay between vitamin D and viral infections. *Rev Med Virol* 2019;29. <https://doi.org/10.1002/RMV.2032>.
- [24] DA J, CA C, JD S, M A, JF A, D G, et al. Vitamin D supplementation to prevent acute respiratory infections: a systematic review and meta-analysis of aggregate data from randomised controlled trials. *Lancet Diabetes Endocrinol* 2021;9:276–92. [https://doi.org/10.1016/S2213-8587\(21\)00051-6](https://doi.org/10.1016/S2213-8587(21)00051-6).
- [25] Lips P. Vitamin D to prevent acute respiratory infections. *Lancet Diabetes Endocrinol* 2021;9:249–51. [https://doi.org/10.1016/S2213-8587\(21\)00075-9](https://doi.org/10.1016/S2213-8587(21)00075-9).
- [26] E M, R M, OA N. Shedding light on vitamin D: the shared mechanistic and pathophysiological role between hypovitaminosis D and COVID-19 risk factors and complications. *Inflammopharmacology* 2021;29. <https://doi.org/10.1007/S10787-021-00835-6>.
- [27] Kumar R, Rathi H, Haq A, Wimalawansa SJ, Sharma A. Putative roles of vitamin D in modulating immune response and immunopathology associated with COVID-19. *Virus Res* 2021;292. <https://doi.org/10.1016/J.VIRUSRES.2020.198235>.
- [28] Z R-E, AR M, EM C, RJ M, A D, S L-N, et al. Vitamin D and coronavirus disease 2019 (COVID-19): rapid evidence review. *Aging Clin Exp Res* 2021;33:2031–41. <https://doi.org/10.1007/S40520-021-01894-Z>.

## **Figure legends**

**Fig.1.** Literature search results

**Fig.2.** The Forest plot for association of vitamin D intervention in COVID-19

**Fig.3.** The Funnel plot for publication bias

**Table 1.** The study characteristics of all RCTs included in the meta-analysis

**Table 2.** The results of subgroup analysis

**Supplementary Appendix:** Risk of bias assessment

**Table 1.** The study characteristics of all RCTs included in the meta-analysis

| Variable     | Castillo ME et al., 2020                                                                                                                                                  | Lakkireddy et al., 2021                                                                                                                                            | Murai IH et al., 2021                                                                                                                    | Rastogi A et al., 2020                                                                                        | Sabico S et al., 2021                                                                                                                | Sánchez-Zuno GA et al., 2021                                                                              |
|--------------|---------------------------------------------------------------------------------------------------------------------------------------------------------------------------|--------------------------------------------------------------------------------------------------------------------------------------------------------------------|------------------------------------------------------------------------------------------------------------------------------------------|---------------------------------------------------------------------------------------------------------------|--------------------------------------------------------------------------------------------------------------------------------------|-----------------------------------------------------------------------------------------------------------|
| Design       | <ul style="list-style-type: none"> <li>Parallel pilot randomized open label, double-masked clinical trial</li> <li>Pilot study of COVIDIOL trial (NCT04366908)</li> </ul> | <ul style="list-style-type: none"> <li>Randomized prospective open label parallel assignment interventional clinical trial</li> <li>CTRI/2020/12/030083</li> </ul> | <ul style="list-style-type: none"> <li>Multicenter double-blind randomized placebo-controlled trial</li> <li>NCT04449718</li> </ul>      | <ul style="list-style-type: none"> <li>Randomized placebo-controlled trial</li> <li>NCT04459247</li> </ul>    | Multicenter randomized clinical trial                                                                                                | Randomized clinical trial                                                                                 |
| Setting      | University hospital setting, Spain                                                                                                                                        | Gandhi Medical College Hospital, India                                                                                                                             | University of Sao Paulo, Brazil                                                                                                          | Post graduate institute of medical education and research, India                                              | All tertiary care hospitals, Riyadh, Saudi Arabia                                                                                    | Universidad de Guadalajara, Mexico                                                                        |
| Participants | <ul style="list-style-type: none"> <li>Total (76)</li> <li>M/F (45/31)</li> <li>Mean age (53y)</li> </ul>                                                                 | <ul style="list-style-type: none"> <li>Total (130)</li> <li>Study completed (87)</li> <li>M/F (65/22)</li> <li>Mean age (45y)</li> </ul>                           | <ul style="list-style-type: none"> <li>Total (240)</li> <li>Randomized (237)</li> <li>M/F (133/104)</li> <li>Mean age (56.2y)</li> </ul> | <ul style="list-style-type: none"> <li>Total (40)</li> <li>M/F (20/20)</li> <li>Age range (36-51y)</li> </ul> | <ul style="list-style-type: none"> <li>Total (77)</li> <li>Randomized (73)</li> <li>M/F (34/35)</li> <li>Mean age (49.8y)</li> </ul> | <ul style="list-style-type: none"> <li>Total (42)</li> <li>M/F (20/22)</li> <li>Mean age (43y)</li> </ul> |
| Groups       | <ul style="list-style-type: none"> <li>Experimental: Calcifediol treatment (n=50)</li> </ul>                                                                              | <ul style="list-style-type: none"> <li>Experimental: Vitamin D treatment (n=44)</li> </ul>                                                                         | <ul style="list-style-type: none"> <li>Experimental: Vitamin D3 treatment (n=119)</li> </ul>                                             | <ul style="list-style-type: none"> <li>Experimental: cholecalciferol treatment (n=16)</li> </ul>              | <ul style="list-style-type: none"> <li>Experimental: 5000 IU cholecalciferol (n=36)</li> </ul>                                       | <ul style="list-style-type: none"> <li>Experimental: vitamin D3</li> </ul>                                |

|                     |                                                                                                                          |                                                                                                                  |                                                                                                                                                                |                                                                                                 |                                                                                                                                                                                                              |                                                                                                                          |
|---------------------|--------------------------------------------------------------------------------------------------------------------------|------------------------------------------------------------------------------------------------------------------|----------------------------------------------------------------------------------------------------------------------------------------------------------------|-------------------------------------------------------------------------------------------------|--------------------------------------------------------------------------------------------------------------------------------------------------------------------------------------------------------------|--------------------------------------------------------------------------------------------------------------------------|
|                     | <ul style="list-style-type: none"> <li>• Comparator: no-calcifediol (n=26) groups</li> </ul>                             | <ul style="list-style-type: none"> <li>• Comparator: non-vitamin D (n=43) groups</li> </ul>                      | <ul style="list-style-type: none"> <li>• Comparator: Placebo (n=118) groups</li> </ul>                                                                         | <ul style="list-style-type: none"> <li>• Comparator Placebo (n=24) groups</li> </ul>            | <ul style="list-style-type: none"> <li>• Comparator: 1000 IU cholecalciferol (n=33) groups</li> </ul>                                                                                                        | <ul style="list-style-type: none"> <li>• Comparator: no-vitamin D3 (n=20) control groups (n=22)</li> </ul>               |
| Matching            | Age, sex, comorbidities (but HT), baseline oxygen saturation, CRP, LDH, D-D, lymphocytes, Ferritin, IL-6                 | Age, BMI, duration of symptoms, comorbidities, DBP, SBP, HR, SpO <sub>2</sub> , mean hospital stay               | Age, sex, BMI, race, time form symptom onset to enrollment, comorbidities, treatments, mean hospital stay, duration of MV, baseline vitamin D3 level, CRP, D-D | Age, baseline vitamin D3 level, fibrinogen, D-D, procalcitonin, CRP, phosphorus                 | All anthropometries (but age, BMI), comorbidities, vital signs, symptoms, vitamin D levels                                                                                                                   | Anthropometries (age, sex, BMI), comorbidities, number of symptoms, treatment, baseline vitamin D level & sufficiency    |
| Sufficiency         | <ul style="list-style-type: none"> <li>• Baseline vitamin D levels not available</li> </ul>                              | <ul style="list-style-type: none"> <li>• Patients with hypovitaminosis D (&lt;30 ng/mL) were included</li> </ul> | <ul style="list-style-type: none"> <li>• Deficiency &lt;20 ng/mL (115)</li> <li>• Sufficiency ≥30 ng/mL</li> </ul>                                             | <ul style="list-style-type: none"> <li>• Deficiency &lt;20 ng/mL (40)</li> </ul>                | <ul style="list-style-type: none"> <li>• Suboptimal vitamin D status</li> <li>• Mild deficiency &lt;50 nmol/L (40)</li> <li>• Insufficiency (rest of the cases)</li> <li>• Sufficiency ≥75 nmol/L</li> </ul> | <ul style="list-style-type: none"> <li>• Sufficiency ≥30 ng/mL (8)</li> <li>• Insufficiency &lt;30 ng/mL (34)</li> </ul> |
| Vitamin-D treatment | <ul style="list-style-type: none"> <li>• Oral Calcifediol (Faes-Farma, Lejona, Spain)</li> <li>• On admission</li> </ul> | <ul style="list-style-type: none"> <li>• Pulse D therapy in the form of aqueol nano</li> </ul>                   | <ul style="list-style-type: none"> <li>• Single oral dose of vitamin D3 (200000 IU dissolved in</li> </ul>                                                     | <ul style="list-style-type: none"> <li>• Oral cholecalciferol (nano-liquid droplets)</li> </ul> | <ul style="list-style-type: none"> <li>• 125 µg cholecalciferol orally daily for 2w (5000</li> </ul>                                                                                                         | <ul style="list-style-type: none"> <li>• 10000 IU cholecalciferol orally for</li> </ul>                                  |

|                    |                                                                                                                                                                |                                                                                                                                                                                                                   |                                                                                                                                                            |                                                                                                                                                                                                                                                                                                                                     |                                                                                                                                                     |                                                                                                         |
|--------------------|----------------------------------------------------------------------------------------------------------------------------------------------------------------|-------------------------------------------------------------------------------------------------------------------------------------------------------------------------------------------------------------------|------------------------------------------------------------------------------------------------------------------------------------------------------------|-------------------------------------------------------------------------------------------------------------------------------------------------------------------------------------------------------------------------------------------------------------------------------------------------------------------------------------|-----------------------------------------------------------------------------------------------------------------------------------------------------|---------------------------------------------------------------------------------------------------------|
|                    | <ul style="list-style-type: none"> <li>day (0.532 mg)</li> <li>On day 3 &amp; 7 (0.266 mg)</li> <li>Weekly until discharge/ICU admission (0.266 mg)</li> </ul> | <ul style="list-style-type: none"> <li>solution (Deksel)</li> <li>60,000 IUs of vitamin D daily for 8 days in case of BMI (18-25) or 10 days in case of BMI (&gt;25) in addition to standard treatment</li> </ul> | <ul style="list-style-type: none"> <li>10mL peanut oil solution) for experimental group</li> <li>10 mL of peanut oil solution for placebo group</li> </ul> | <ul style="list-style-type: none"> <li>60000 IU daily for 7 days initially with a therapeutic target of &gt;50 ng/mL.</li> <li>Supplementation was continued (n=6) when vitamin D level &lt;50 ng/mL in the intervention arm for another 7 days until day-14.</li> <li>5 mL of distilled water for placebo control group</li> </ul> | <ul style="list-style-type: none"> <li>IU group)</li> <li>25 µg cholecalciferol orally daily for 2w (1000 IU group, Synergy Pharma, UAE)</li> </ul> | <ul style="list-style-type: none"> <li>14 days (Soft capsule)</li> </ul>                                |
| Guidelines         | WHO, CONSORT                                                                                                                                                   | WHO, CONSORT, ICMR, DGHS (GoI)                                                                                                                                                                                    | PCR, ELISA for IgG, computed tomography                                                                                                                    | ICMR, CONSORT                                                                                                                                                                                                                                                                                                                       | MoH-SA, GCC, CONSORT                                                                                                                                | NA                                                                                                      |
| Inclusion criteria | <ul style="list-style-type: none"> <li>Age ≥18y</li> <li>Radiographic pattern of viral pneumonia</li> <li>Positive SARS-CoV-2 PCR with CURB65</li> </ul>       | <ul style="list-style-type: none"> <li>Age &gt;18y</li> <li>Hypovitaminosis D (&lt;30 ng/mL)</li> <li>Mild-moderate</li> </ul>                                                                                    | <ul style="list-style-type: none"> <li>Age ≥18y</li> <li>Moderate-severe COVID-19 diagnosed by PCR, ELISA (IgG) or computed</li> </ul>                     | <ul style="list-style-type: none"> <li>Age &gt;18y</li> <li>Mildly symptomatic or symptomatic COVID-19 diagnosed by</li> </ul>                                                                                                                                                                                                      | <ul style="list-style-type: none"> <li>Age 20-75y</li> <li>RT-PCR confirmed mild-moderate SARS-CoV-2 cases</li> </ul>                               | <ul style="list-style-type: none"> <li>Age &gt;18y</li> <li>Mild disease diagnosed by RT-PCR</li> </ul> |

|                                        | severity scale                                                                                                                                                                                  | illness<br>(SpO <sub>2</sub> >90%)                                                                                                                                                                                    | tomography<br>(bilateral<br>multifocal<br>ground-glass<br>opacity ≥50%)<br>or respiratory<br>rate >24/min or<br>saturation <93%                                                                                                     | RT-PCR                                                                                                                                                                        |                                                                                                                                                                           |                                                                                                             |
|----------------------------------------|-------------------------------------------------------------------------------------------------------------------------------------------------------------------------------------------------|-----------------------------------------------------------------------------------------------------------------------------------------------------------------------------------------------------------------------|-------------------------------------------------------------------------------------------------------------------------------------------------------------------------------------------------------------------------------------|-------------------------------------------------------------------------------------------------------------------------------------------------------------------------------|---------------------------------------------------------------------------------------------------------------------------------------------------------------------------|-------------------------------------------------------------------------------------------------------------|
| Exclusion<br>criteria                  | <ul style="list-style-type: none"> <li>Age &lt;18 y</li> <li>Pregnant women</li> </ul>                                                                                                          | <ul style="list-style-type: none"> <li>Severe illness</li> <li>High dose vitamin D (60,000 IUs) in last 3m</li> <li>Active malignancy</li> <li>CKD</li> <li>HIV</li> <li>Pregnant and breast feeding women</li> </ul> | <ul style="list-style-type: none"> <li>Already admitted and receiving invasive mechanical ventilation</li> <li>Received previous vitamin D3 supplementation</li> <li>Kidney failure</li> <li>Pregnant or lactating women</li> </ul> | <ul style="list-style-type: none"> <li>Patients requiring invasive ventilation</li> <li>Uncontrolled hyperglycemia or hypertension</li> <li>Vitamin D &gt;20 ng/mL</li> </ul> | <ul style="list-style-type: none"> <li>Severe COVID-19 cases</li> <li>Asymptomatic cases</li> <li>Children and pregnant women</li> <li>Vitamin D &gt;75 nmol/L</li> </ul> | <ul style="list-style-type: none"> <li>Age &lt;18 y</li> <li>Previous vitamin D3 supplementation</li> </ul> |
| Comorbidities/other<br>risk<br>factors | <ul style="list-style-type: none"> <li>Age ≥60 y (19)</li> <li>Lung disease (6)</li> <li>CKD (0)</li> <li>DM (8)</li> <li>HT (26)</li> <li>CVD (3)</li> <li>IST (7)</li> <li>AC (40)</li> </ul> | DM or HT (34)                                                                                                                                                                                                         | HT (125)<br>DM (84)<br>CVD (32)<br>Rheumatic (23)<br>Asthma (14)<br>COPD (12)<br>CKD (2)                                                                                                                                            | HT<br>DM<br>CKD<br>CLD<br>COPD (Exact number of patients with comorbidities not available)                                                                                    | HT (38)<br>DM (35)<br>OB (23)<br>HL (9)<br>CKD (5)<br>CVD (4)<br>Asthma (3)<br>Rheumatoid (2)<br>Thyroid (2)<br>Epilepsy (1)                                              | HT (7)<br>DM (2)<br>Asthma (1)<br>Smoke (4)                                                                 |

|                                            |                                                                                                                                                                                                                                                                                                                             |                                                                                                                                                                |                                                                                                                                                                                                                                                                                                                                                                                   |                                                                                                                            |                                                                                                         |                                                                                                                  |
|--------------------------------------------|-----------------------------------------------------------------------------------------------------------------------------------------------------------------------------------------------------------------------------------------------------------------------------------------------------------------------------|----------------------------------------------------------------------------------------------------------------------------------------------------------------|-----------------------------------------------------------------------------------------------------------------------------------------------------------------------------------------------------------------------------------------------------------------------------------------------------------------------------------------------------------------------------------|----------------------------------------------------------------------------------------------------------------------------|---------------------------------------------------------------------------------------------------------|------------------------------------------------------------------------------------------------------------------|
| Treatments                                 | <ul style="list-style-type: none"> <li>Standard care (hospital protocol)</li> <li>HCQ (400 mg every 12h on 1<sup>st</sup> day &amp; 200 mg every 12h for following 5 days)</li> <li>AZM (500 mg for 5 days)</li> <li>CRO (2g IV every 24h for 5 days for pneumonia patients with NEWS score <math>\geq 5</math>)</li> </ul> | <ul style="list-style-type: none"> <li>Routine standard treatment for COVID-19</li> <li>Remdesivir, Favipiravir, Ivermectin or Dexamethasone (n=57)</li> </ul> | <p>Supplemental oxygen therapy at baseline (181)</p> <p>Noninvasive ventilation (31)</p> <p>Anticoagulant (210)</p> <p>Antibiotic (204)</p> <p>Corticosteroids (150)</p> <p>Antihypertensive (124)</p> <p>Proton-pump inhibitor (96)</p> <p>Antiemetic (99)</p> <p>Analgesic (97)</p> <p>Hypoglycemic (50)</p> <p>Hypolipidemic (33)</p> <p>Thyroid (20)</p> <p>Antiviral (8)</p> | <p>Standard care for SARS-CoV-2 and for pre-existing comorbidities as per institute protocol</p>                           | Vitamin C (34)                                                                                          | <p>Analgesic (22), Antipyretic (17), Antibiotic (8), Antihistamine (6), Anticoagulant (5), Other drugs (10)</p>  |
| Adverse events related to Vit. D treatment | NA                                                                                                                                                                                                                                                                                                                          | None                                                                                                                                                           | None (Except for 1 patient who vomited)                                                                                                                                                                                                                                                                                                                                           | None                                                                                                                       | None                                                                                                    | None                                                                                                             |
| Randomization, Allocation                  | <ul style="list-style-type: none"> <li>Electronic randomization</li> <li>2:1</li> <li>Homogenous distribution has not been achieved for all variables between comparison</li> </ul>                                                                                                                                         | <ul style="list-style-type: none"> <li>Alternatively as per pre-allotted serial numbers</li> <li>1:1</li> </ul>                                                | <ul style="list-style-type: none"> <li>Computer-generated code with block sizes of 20</li> <li>1:1</li> </ul>                                                                                                                                                                                                                                                                     | <ul style="list-style-type: none"> <li>Randomized into interventional and placebo-control groups</li> <li>1:1.5</li> </ul> | <ul style="list-style-type: none"> <li>Computer generated using permuted blocks</li> <li>1:1</li> </ul> | <ul style="list-style-type: none"> <li>Randomized into interventional and control groups</li> <li>1:1</li> </ul> |

|                                            |                                                                                                                                                                                                                           |                                                                                                             |                                                                                                                                                               |                                                                                                                         |                                                                                                                                                                                    |                                                                                                               |
|--------------------------------------------|---------------------------------------------------------------------------------------------------------------------------------------------------------------------------------------------------------------------------|-------------------------------------------------------------------------------------------------------------|---------------------------------------------------------------------------------------------------------------------------------------------------------------|-------------------------------------------------------------------------------------------------------------------------|------------------------------------------------------------------------------------------------------------------------------------------------------------------------------------|---------------------------------------------------------------------------------------------------------------|
| Blinding                                   | <ul style="list-style-type: none"> <li>groups</li> <li>Not double-blinded</li> <li>Observation bias was minimized by blind access to technical data collectors and the statistician who carried out the study.</li> </ul> | <ul style="list-style-type: none"> <li>NA</li> </ul>                                                        | <ul style="list-style-type: none"> <li>Double-blind</li> <li>Patients and investigators remained blinded to randomization until the final analysis</li> </ul> | <ul style="list-style-type: none"> <li>NA</li> </ul>                                                                    | <ul style="list-style-type: none"> <li>Not double-blinded</li> <li>Risk of bias was minimized by blinded data collection</li> </ul>                                                | <ul style="list-style-type: none"> <li>Not double-blinded</li> </ul>                                          |
| Follow-up/Study duration/lost to follow-up | Until admission to ICU, hospital discharge or death                                                                                                                                                                       | Analysis on 9 <sup>th</sup> or 11 <sup>th</sup> day, deaths till 21 days on enrolment                       | June 2 to Aug 27, 2020<br>Final follow-up on Oct 7, 2020                                                                                                      | <ul style="list-style-type: none"> <li>Days-7, 14 and until day-21 or virus negativity</li> </ul>                       | <ul style="list-style-type: none"> <li>29 July – 22 Sep 2020</li> <li>Followed-up on Day 7 or on discharge day and 30 days after discharge and/or the last vitamin dose</li> </ul> | From the day of recruitment to 14 days                                                                        |
| Information on follow-up loss/withdrawal   | Mentioned in the flow diagram                                                                                                                                                                                             | Mentioned in the flow diagram                                                                               | Mentioned in the flow diagram                                                                                                                                 | Mentioned in the flow diagram                                                                                           | Mentioned in the flow diagram                                                                                                                                                      | NA                                                                                                            |
| Outcomes studied                           | <ul style="list-style-type: none"> <li>ICU admission</li> <li>Deaths</li> </ul>                                                                                                                                           | <ul style="list-style-type: none"> <li>Inflammatory markers (CRP, LDH, IL6, Ferritin, N/L ratio)</li> </ul> | <ul style="list-style-type: none"> <li>Length of hospital stay/discharge probability (date of randomization)</li> </ul>                                       | <ul style="list-style-type: none"> <li>SARS-CoV-2 RT-PCR negativity before day-21 and change in inflammatory</li> </ul> | <ul style="list-style-type: none"> <li>Days to resolve symptoms/discharge</li> <li>Metabolic profile (CBC,</li> </ul>                                                              | <ul style="list-style-type: none"> <li>Severity</li> <li>RT-PCR positivity</li> <li>Seropositivity</li> </ul> |



|                            |                                                                                      |                                                                                                                                |                                                                                                                                                                                                                                                                                                                     |                                                                        |                                                                                                                                                                                  |                                                                                                                 |
|----------------------------|--------------------------------------------------------------------------------------|--------------------------------------------------------------------------------------------------------------------------------|---------------------------------------------------------------------------------------------------------------------------------------------------------------------------------------------------------------------------------------------------------------------------------------------------------------------|------------------------------------------------------------------------|----------------------------------------------------------------------------------------------------------------------------------------------------------------------------------|-----------------------------------------------------------------------------------------------------------------|
| Statistical analysis       | Univariate and multivariate logistic regression                                      | <ul style="list-style-type: none"> <li>• ICU care</li> <li>• Deaths</li> </ul> <p>Number of events for ICU care and deaths</p> | <p>to date of discharge)</p> <ul style="list-style-type: none"> <li>• ICU care</li> <li>• MV</li> <li>• Duration of MV</li> <li>• Deaths</li> </ul> <p>Number of events for ICU care, MV, deaths and discharge probability. Kaplan-Meier curves and Cox regression models for length of hospital stay/discharge</p> | markers                                                                | <p>lipids, CRP, D-D, LDL, IL6, Ferritin)</p> <ul style="list-style-type: none"> <li>• ICU admission</li> <li>• Deaths</li> </ul> <p>Number of events for ICU care and deaths</p> | Number of patients with severity (>3 symptoms), RT-PCR and seropositivity in experimental and comparator groups |
| Adjustment for confounders | DM, HT                                                                               | To overcome the non responder's bias, sample size was adjusted by assuming an expected response proportion of 50%              | Joint pain, sore throat, HT, DM, PTH and creatinine                                                                                                                                                                                                                                                                 | NA                                                                     | Age, sex, baseline BMI, D-D                                                                                                                                                      | NA                                                                                                              |
| Effect sizes               | Univariate and multivariate odds ratio                                               | Univariate odds ratio                                                                                                          | Univariate odds ratios for ICU care, MV and Deaths<br>Uni and multivariate hazard ratios for hospital discharge                                                                                                                                                                                                     | Univariate odds ratio                                                  | Univariate odds ratio                                                                                                                                                            | Univariate odds ratio                                                                                           |
| Results                    | Vitamin D treatment resulted in significantly less probability of ICU admission. The | Improvement of serum vitamin D level to 80–100 ng/mL has                                                                       | The length of hospital stay, ICU care, MV and mortality was not significant between                                                                                                                                                                                                                                 | Significant increase in serum vitamin D with a significant decrease in | 5000 IU vitamin D group had shorter time to recovery symptoms like cough                                                                                                         | A vitamin D3 dose of 10000IU daily for 14 days sufficiently                                                     |

|              |                                                                                                                                                                                                   |                                                                                                |                                                                                                                                                                                                                                                                                 |                                                                                                                                                                                   |                                                                                                                                                                        |                                                                                                                                                 |
|--------------|---------------------------------------------------------------------------------------------------------------------------------------------------------------------------------------------------|------------------------------------------------------------------------------------------------|---------------------------------------------------------------------------------------------------------------------------------------------------------------------------------------------------------------------------------------------------------------------------------|-----------------------------------------------------------------------------------------------------------------------------------------------------------------------------------|------------------------------------------------------------------------------------------------------------------------------------------------------------------------|-------------------------------------------------------------------------------------------------------------------------------------------------|
|              | statistical significance was retained after adjusting for HT and DM.                                                                                                                              | significantly reduced the inflammatory markers without any side effects.                       | groups. Serum vitamin D3 level significantly increased after a single dose supplementation                                                                                                                                                                                      | fibrinogen in the intervention group. Significant difference in the number of SARS-CoV-2 RT-PCR negativity between two groups.                                                    | and ageusia                                                                                                                                                            | raises serum vitamin D levels                                                                                                                   |
| Conclusions  | Calcifediol supplementation may improve the clinical outcome of subjects requiring hospitalization for COVID-19                                                                                   | Adjunctive Pulse D therapy can be added safely to the existing treatment protocols of COVID-19 | A single high dose of vitamin D3 did not significantly reduce hospital length of stay                                                                                                                                                                                           | High dose cholecalciferol supplementation resulted in a greater proportion of SARS-CoV-2 RT-PCR negativity                                                                        | The beneficial effects of 5000 IU vitamin D as an adjuvant therapy for COVID-19 patients with suboptimal vitamin D status                                              | Supplementation of vitamin D have significant benefits in COVID-19 due to immunomodulatory effects<br>No double blind design<br>Only mild cases |
| Limitations  | <ul style="list-style-type: none"> <li>• Pilot study and not double-blind placebo controlled</li> <li>• Role of BMI/obesity not considered</li> <li>• Serum 25OHD levels not available</li> </ul> | Single centre study                                                                            | <ul style="list-style-type: none"> <li>• Low sample size</li> <li>• Coexisting diseases</li> <li>• Sample and treatment heterogeneity</li> <li>• A single high dose vitamin D3 supplementation after a mean duration of 10.3days from symptom onset to randomization</li> </ul> | <ul style="list-style-type: none"> <li>• Only mildly symptomatic or asymptomatic cases</li> <li>• High-dose of cholecalciferol</li> <li>• Water supplement for placebo</li> </ul> | <ul style="list-style-type: none"> <li>• Open-label design (risk of bias has been minimized by blinded data collection)</li> <li>• Only mild-moderate cases</li> </ul> |                                                                                                                                                 |
| IEC approval | Reina Sofia University Hospital, Corodoba,                                                                                                                                                        | Gandhi Medical College,                                                                        | Clinical Hospital, School of Medicine,                                                                                                                                                                                                                                          | Post graduate institute of medical                                                                                                                                                | King Fahad Medical City, Saudi Arabia                                                                                                                                  | Universidad de Guadalajara,                                                                                                                     |

---

|       |                  |                         |                               |                             |
|-------|------------------|-------------------------|-------------------------------|-----------------------------|
| Spain | Hyderabad, India | University of Sao Paulo | education and research, India | Faculty of Medicine, Mexico |
|-------|------------------|-------------------------|-------------------------------|-----------------------------|

---

AC: any comorbidity, BMI: body mass index, CKD: chronic kidney disease, CLD: chronic liver disease, CONSORT: Consolidated Standards of Reporting Trials, COPD: chronic obstructive pulmonary disease, CRP: c reactive protein, CVD: cardiovascular disease, DBP: diastolic blood pressure, D-D: D-dimer, DGHS: Directorate General of Health Services, DM: diabetes mellitus, ELISA: enzyme-linked immunoassay, F: female, GCC: Gulf Cooperation Council, GoI: Government of India, HIV: Human immunodeficiency virus, HL: hyperlipidemia, HR: heart rate, HT: hypertension, ICMR: Indian council of medical research, ICU: intensive care unit, Ig: immunoglobulin, IL-6: interleukin 6, IST: Immunosuppressed and transplanted, IU: international units, LDH: lactate dehydrogenase, M: male, MoH-SA: Ministry of Health-Saudi Arabia, MV: mechanical ventilation, NA: not available, OB: obesity, OR: odds ratio, RT-PCR: reverse transcription–polymerase chain reaction, SARS-CoV-2: severe acute respiratory syndrome associated with coronavirus-2, SBP: systolic blood pressure, SpO2: oxygen saturation, Vitamin D3: cholecalciferol, WHO: world health organization, y: years. The numerical values in ( ) indicate the number of participants.

**Table 2.** The results of subgroup analysis

| <b>Outcome variable</b>                                                               | <b>No. of studies [Ref]</b> | <b>RR (95% CI)</b> | <b>Z</b> | <b>p-value</b> | <b>I<sup>2</sup>%</b> |
|---------------------------------------------------------------------------------------|-----------------------------|--------------------|----------|----------------|-----------------------|
| <b>All RCTs</b>                                                                       |                             |                    |          |                |                       |
| All outcomes composite:<br>(severity, ICU, MV, mortality, sero and RT-PCR positivity) | 6                           | 0.60 (0.40-0.92)   | 2.33     | 0.02           | 48                    |
| Symptom severity                                                                      | 1                           | 0.10 (0.01-1.77)   | 1.57     | 0.12           | NA                    |
| ICU Care                                                                              | 4                           | 0.44 (0.15-1.30)   | 1.48     | 0.14           | 66                    |
| Mechanical ventilation                                                                | 1                           | 0.52 (0.24-1.13)   | 1.65     | 0.10           | NA                    |
| Mortality                                                                             | 4                           | 0.78 (0.25-2.40)   | 0.44     | 0.66           | 33                    |
| Seropositivity                                                                        | 1                           | 0.97 (0.68-1.39)   | 0.17     | 0.87           | NA                    |
| RT-PCR positivity                                                                     | 2                           | 0.46 (0.24-0.89)   | 2.31     | 0.02           | 0                     |
| <b>Single center studies</b>                                                          |                             |                    |          |                |                       |
| ICU                                                                                   | 2                           | 0.19 (0.01-4.23)   | 1.04     | 0.30           | 86                    |
| Mortality                                                                             | 2                           | 0.29 (0.07-1.19)   | 1.71     | 0.09           | 0                     |
| <b>Multicentre studies</b>                                                            |                             |                    |          |                |                       |
| ICU                                                                                   | 2                           | 0.74 (0.44-1.24)   | 1.15     | 0.25           | 0                     |
| Mortality                                                                             | 2                           | 1.57 (0.61-4.09)   | 0.93     | 0.35           | 0                     |
| <b>Cholecalciferol</b>                                                                |                             |                    |          |                |                       |
| ICU                                                                                   | 3                           | 0.75 (0.46-1.20)   | 1.21     | 0.23           | 0                     |
| Mortality                                                                             | 3                           | 1.05 (0.41-2.69)   | 0.10     | 0.92           | 13                    |
| <b>Vitamin D suboptimal status</b>                                                    |                             |                    |          |                |                       |
| All outcomes composite:<br>(severity, ICU, MV, mortality, sero and RT-PCR positivity) | 4                           | 0.70 (0.50-1.15)   | 1.31     | 0.19           | 3                     |
| ICU                                                                                   | 3                           | 1.01 (0.54-1.89)   | 0.02     | 0.98           | 0                     |
| Mortality                                                                             | 3                           | 1.28 (0.25-6.62)   | 0.29     | 0.77           | 41                    |
| <b>Other Outcomes</b>                                                                 |                             |                    |          |                |                       |
| Discharge                                                                             | 2                           | 1.04 (0.97-1.12)   | 1.16     | 0.25           | 0                     |

ICU: intensive care unit, MV: mechanical ventilation, NA: not available, RR: relative risk/risk ratio, RT-PCR: reverse transcription–polymerase chain reaction,

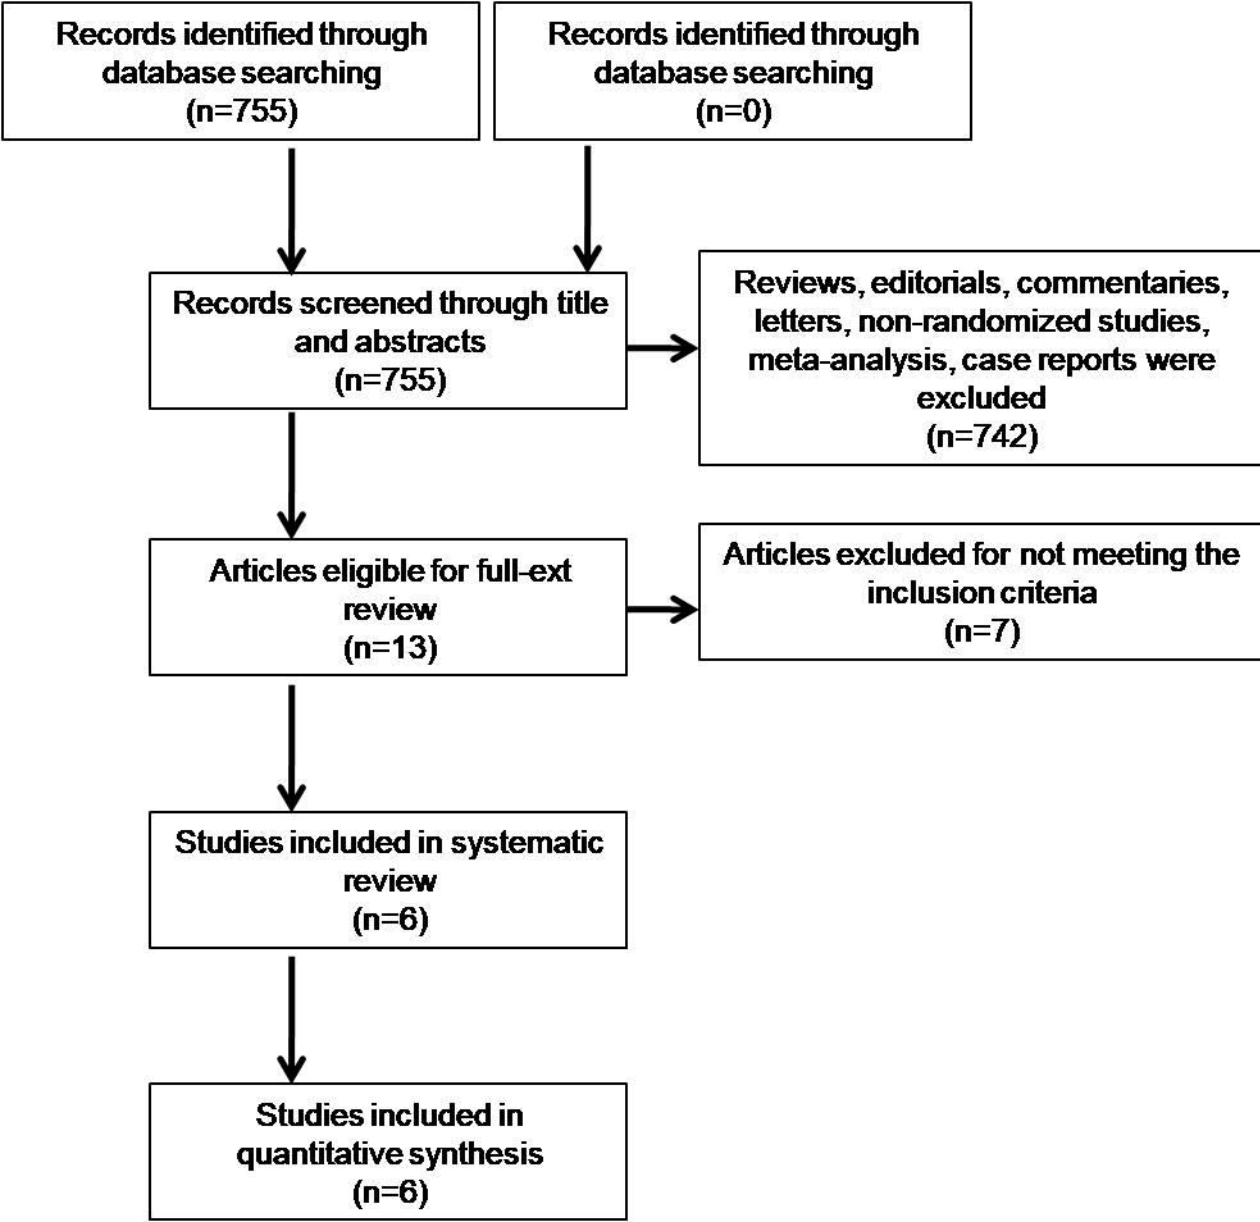

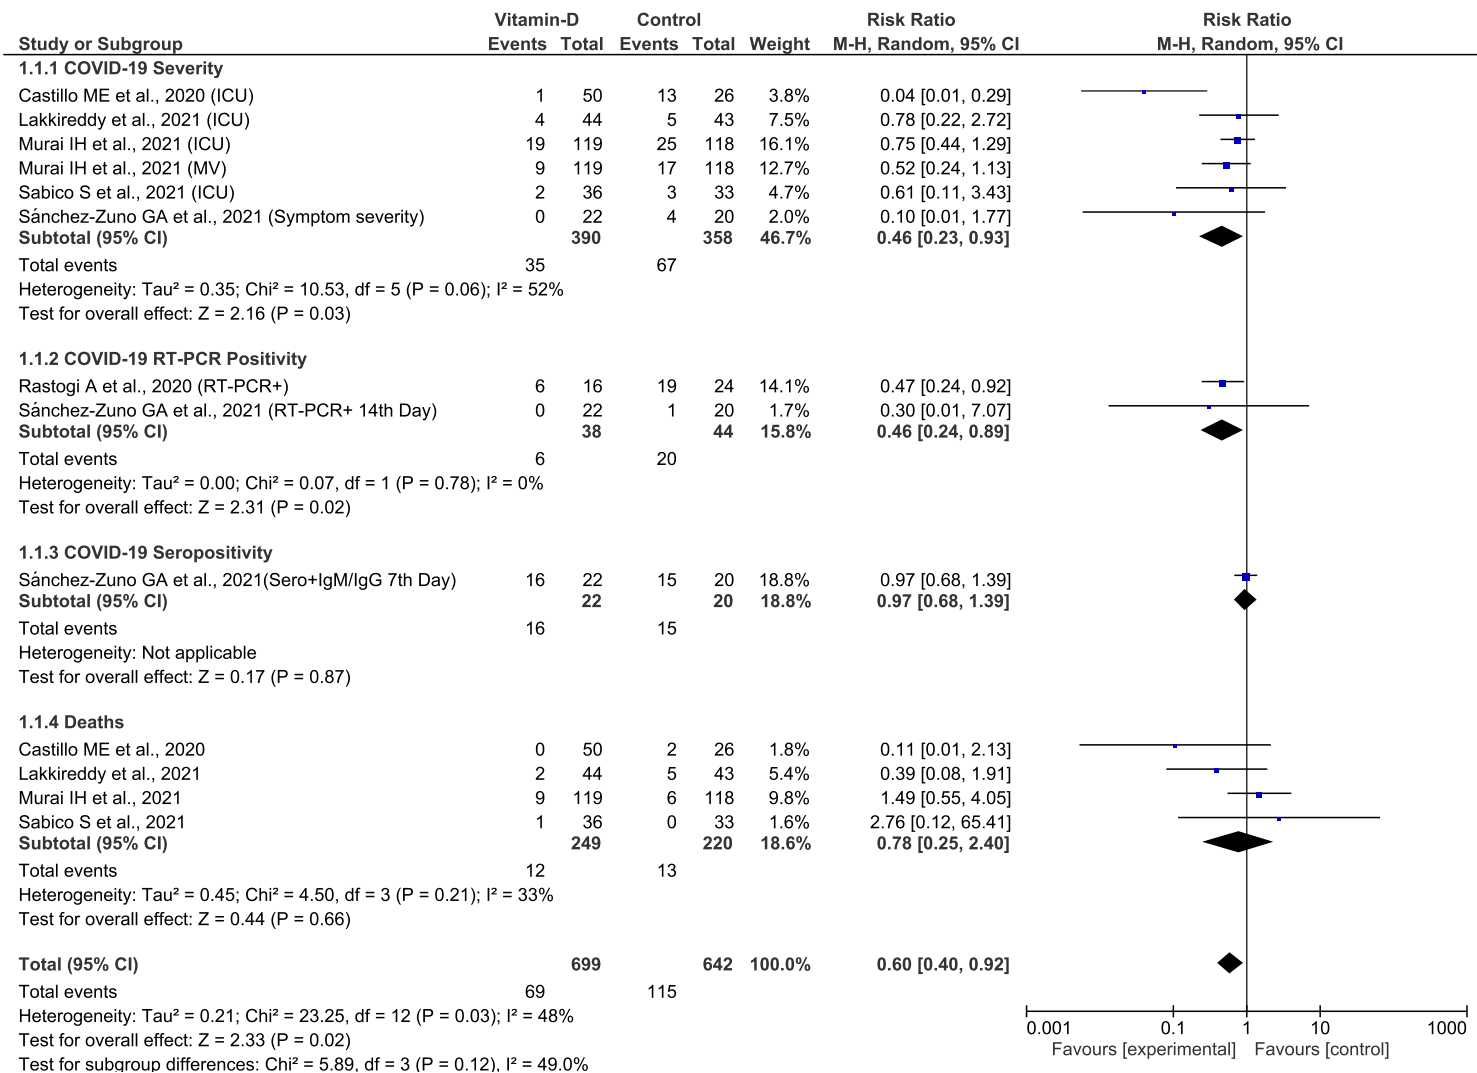

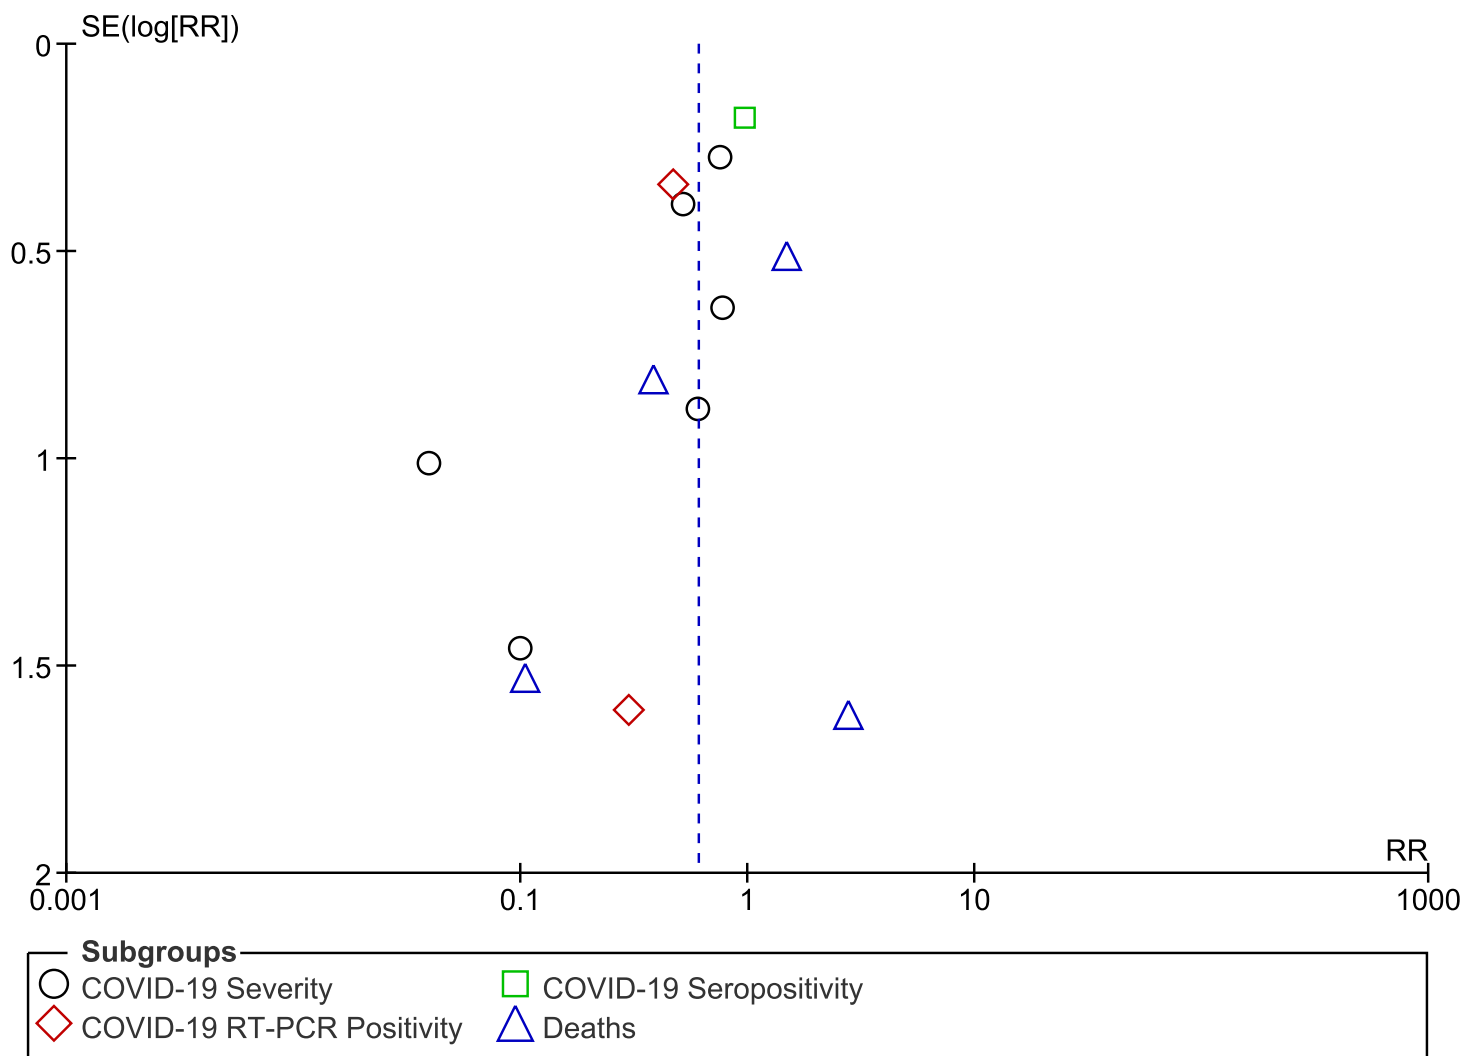

Source: https://medrxiv.org/content/medrxiv/early/2021/08/25/2021.08.22.21262216.full.pdf
